# Supplementary material for: Speciation and Radiation Stability of Cr and Ln “Grey-Phases” within Cr-doped (Ln,U)O 2 Spent Fuel Model Materials
Source: Research Square preprint supplement (doi:10.21203/rs.3.rs-7704941/v1), 2025-10-27
Supplement: Supplementary file 1 [file 9a9a66dcaa33fed6caca7be2.docx]

Supplementary Information

Speciation and Radiation Stability of Cr and *Ln* “Grey-Phases” within Cr-doped (*Ln*,U)O2 Spent Fuel Model Materials

Daniil Shirokiy1*, Andrey Bukaemskiy1, Maximilian Henkes1, Elena F. Bazarkina2,3, Christoph Hennig2,3, Andrew Ryan1,5, Martina Klinkenberg1, Murat Güngör1, Mara McCleary1, Julien Marquardt6, Andrew Fitch4, Kristina O. Kvashnina2,3, Dirk Bosbach1 andGabriel L. Murphy1*

1*Institut of Fusion Energy and Nuclear Waste Management (IFN-2), Forschungszentrum Jülich GmbH, 52428 Jülich, Germany*

2*Institute of Resource Ecology, Helmholtz Zentrum Dresden-Rossendorf, 01328 Dresden, Germany*

*3The Rossendorf Beamline at ESRF, The European Synchrotron, CS40220, 38043, Grenoble Cedex 9, France*

*4ESRF, 71 avenue des Martyrs,* *CS40220, 38043 Grenoble, France*

*5Department and Chemical and Bioengineering, Princeton University, Princeton, NJ 08544, USA*

*6Institut für Geowissenschaften, Goethe-Universität Frankfurt, 60438, Frankfurt am Main, Germany*

*Corresponding authors: *Daniil Shirokiy (*[*d.shirokiy@fz-juelich.de*](mailto:d.shirokiy@fz-juelich.de)*), Gabriel L. Murphy
(*[*g.murphy@fz-juelich.de*](mailto:g.murphy@fz-juelich.de)*)*

# Supplementary Information Note 1. Laboratory X-ray Powder Diffraction

Supplementary Figure 1 display Rietveld refinement profiles for 200 ppm Cr-doped (U0.7Gd.3)O2-x and (U0.7Gd.3)O2-x samples taken using a Brucker D4 diffractometer. It was evident that all samples exhibited single phase under the space group.


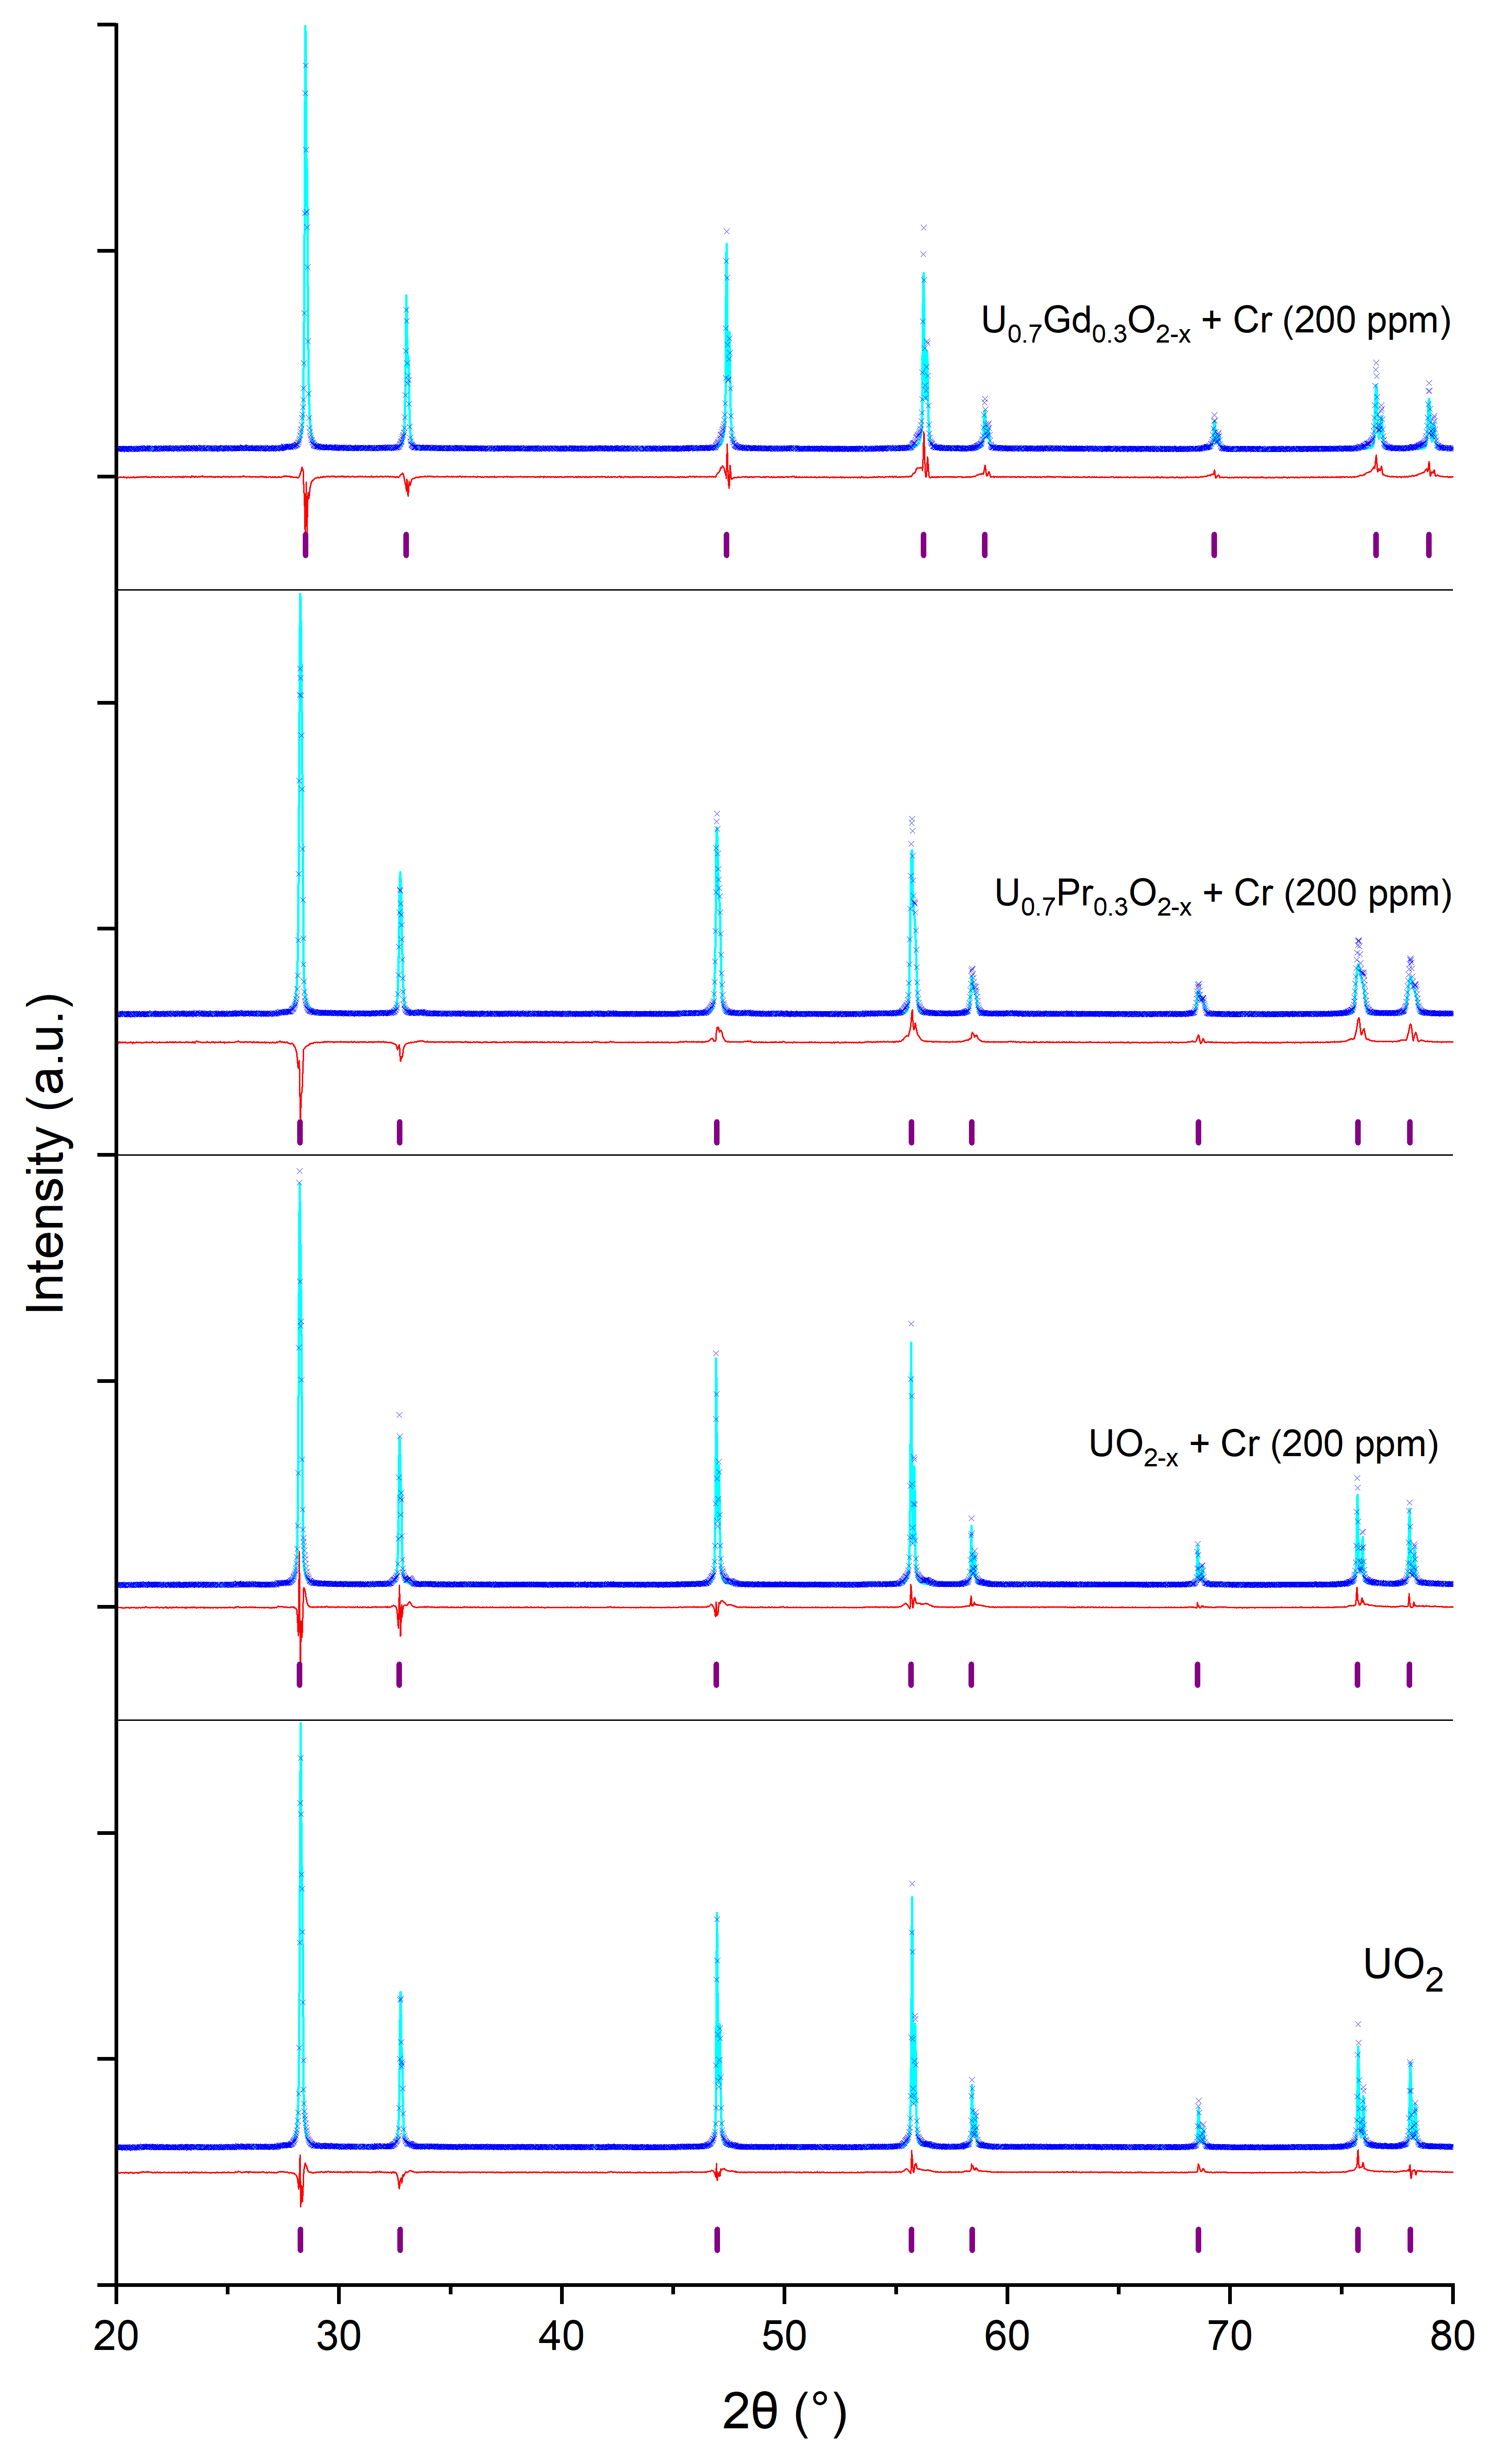


Supplementary Figure – Rietveld refinement of the XRD data obtained using Brucker D4 XRD for pure UO2, 200 ppm Cr-doped UO2-x and 200 ppm Cr-doped (U0.7*Ln*0.3)O2-x samples, was used to confirm the formation of UO2 fluorite lattice material. Measured data, refined models, difference curve and allowed reflections are according to the determined UO2 space group respectively represented by blue markers, cyan lines, red lines and purple vertical markers.

Supplementary Figure 2 display Rietveld refinement profiles for the synthesised perovskite PrCrO3 and GdCrO3 materials.


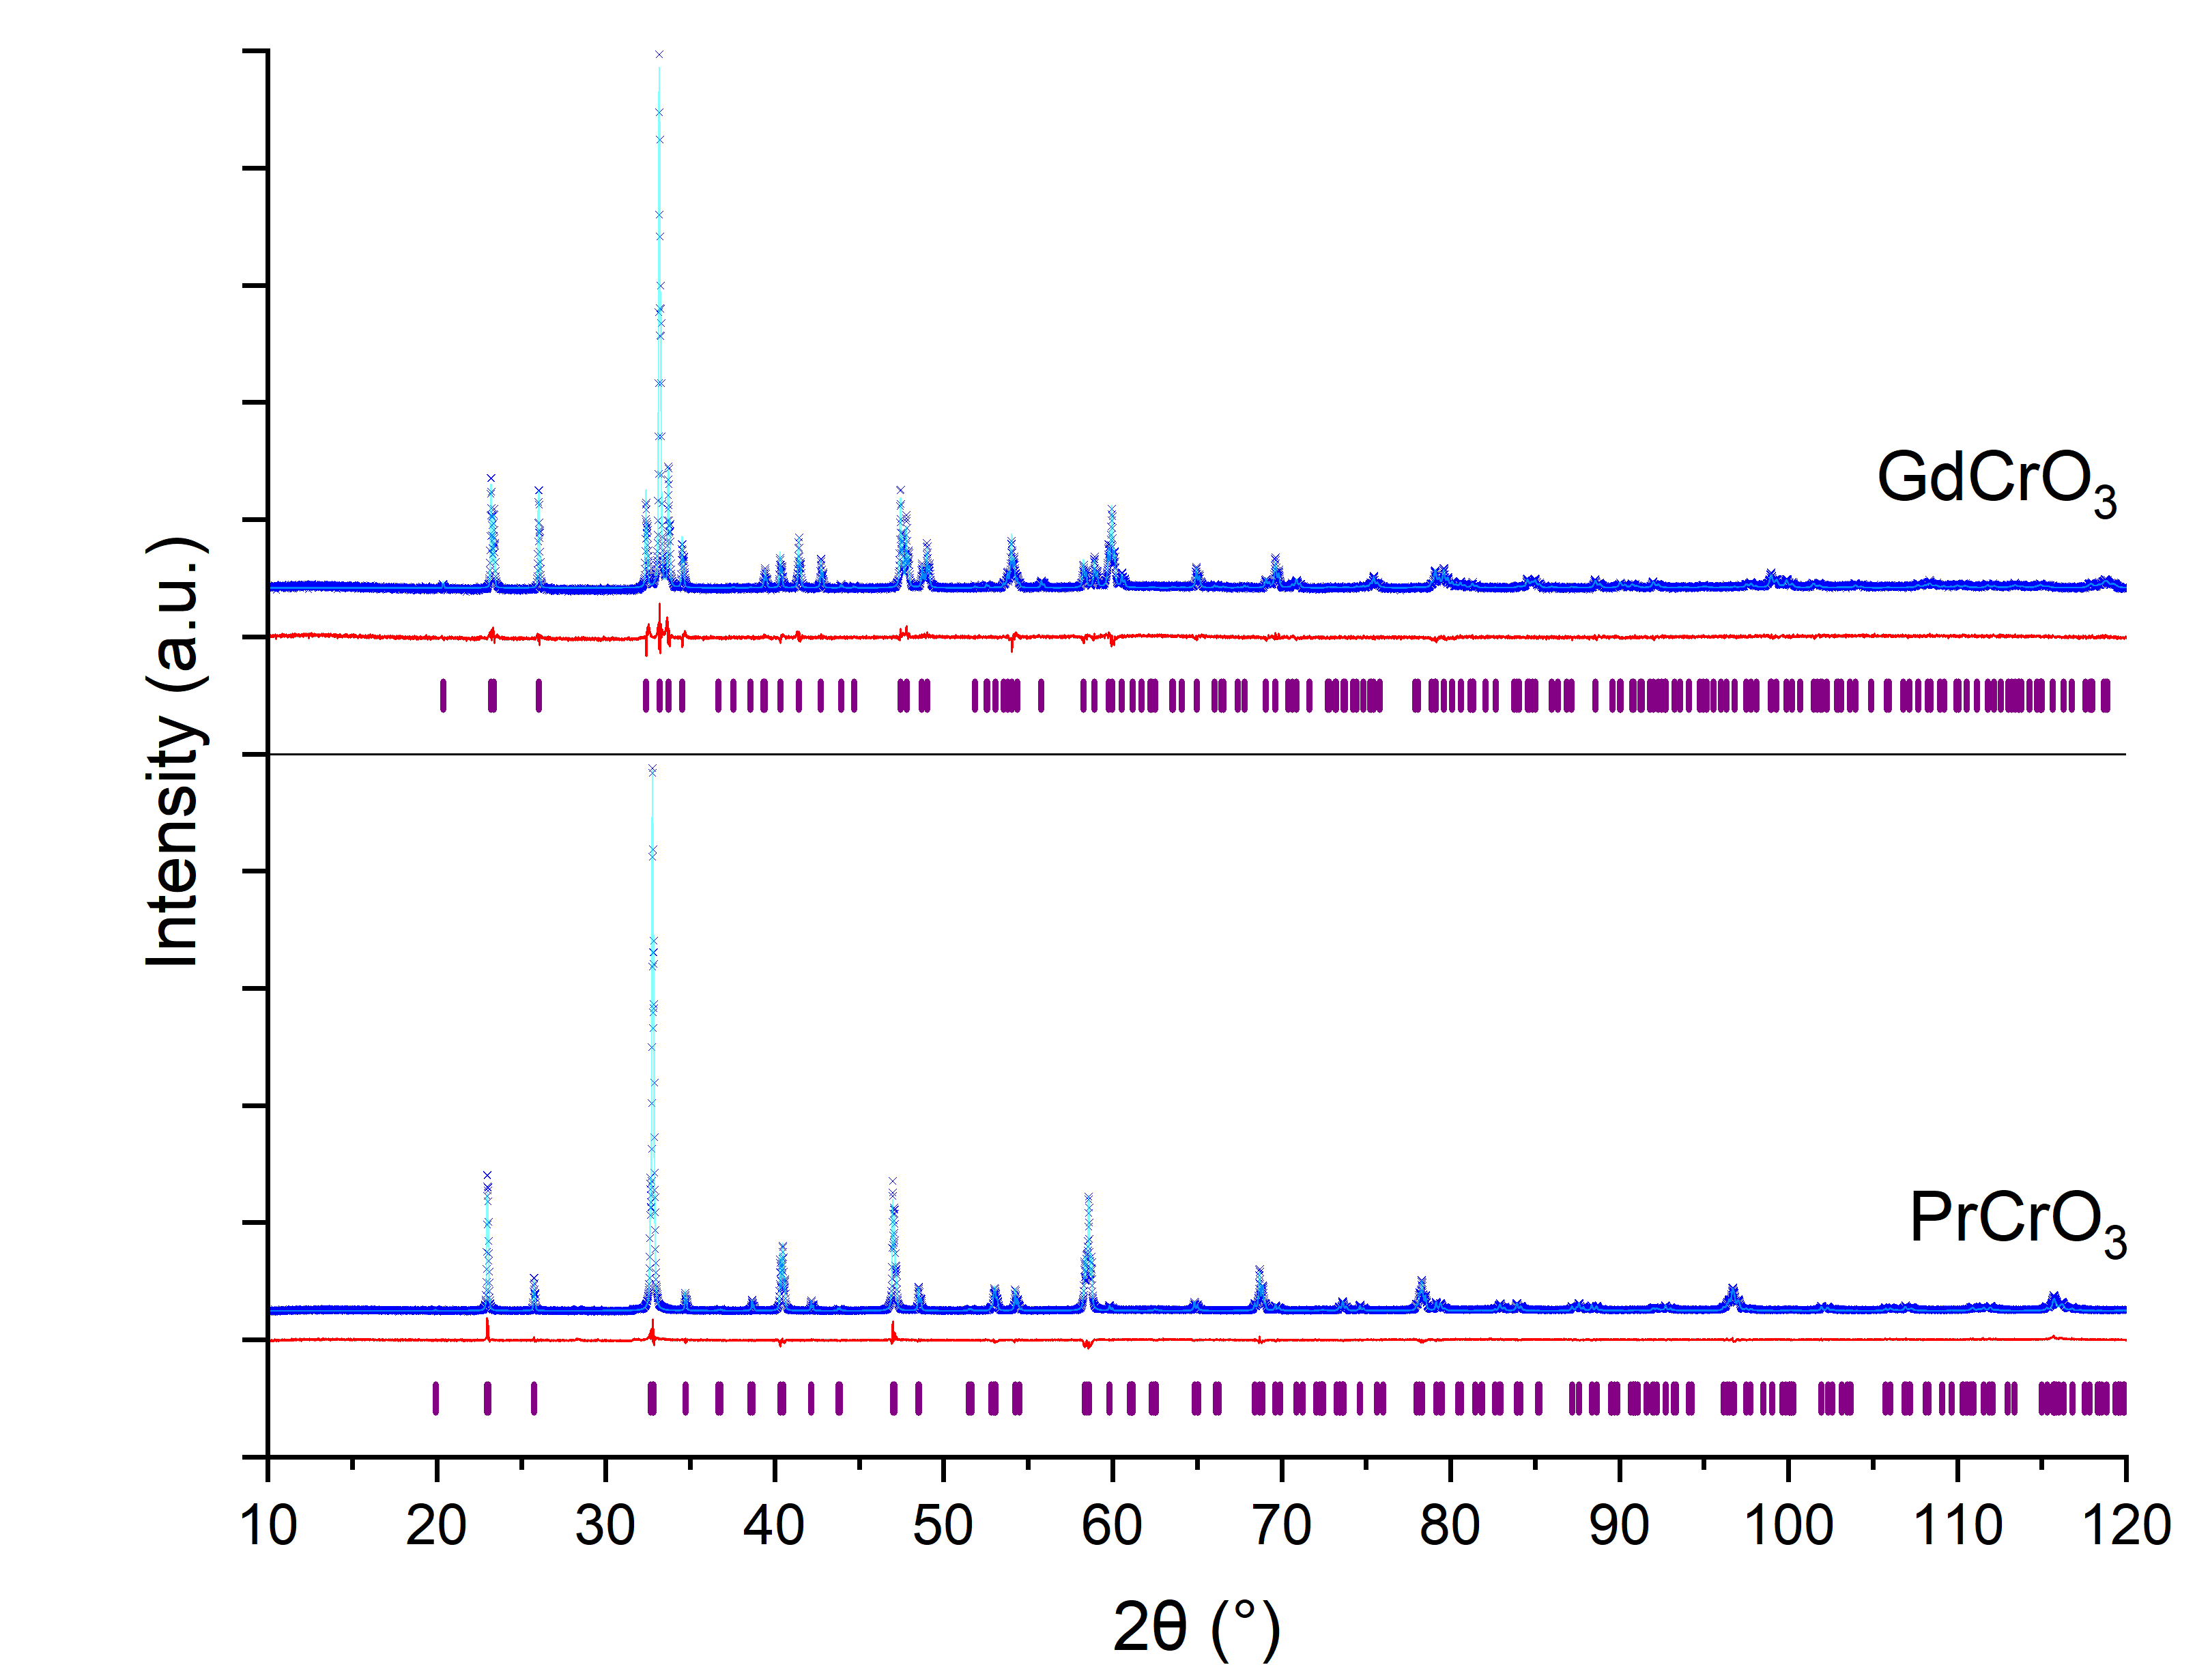


Supplementary Figure – Rietveld refinement of the XRD data obtained using Brucker D4 XRD for PrCrO3 and GdCrO3 materials. The results confirm the synthesis of targeted LnCrO3 perovskite material. Measured data, refined models, difference curve and allowed reflections are according to the space group respectively represented by blue markers, cyan lines, red lines and purple vertical markers.

# Supplementary Information Note 2. Stopping Range of Ions in Matter Results

Supplementary Figure 3 shows the results of the SRIM calculations for the stopping range of 1.3 GeV 197Au+ ions in the perovskite PrCrO3 and GdCrO3 materials.


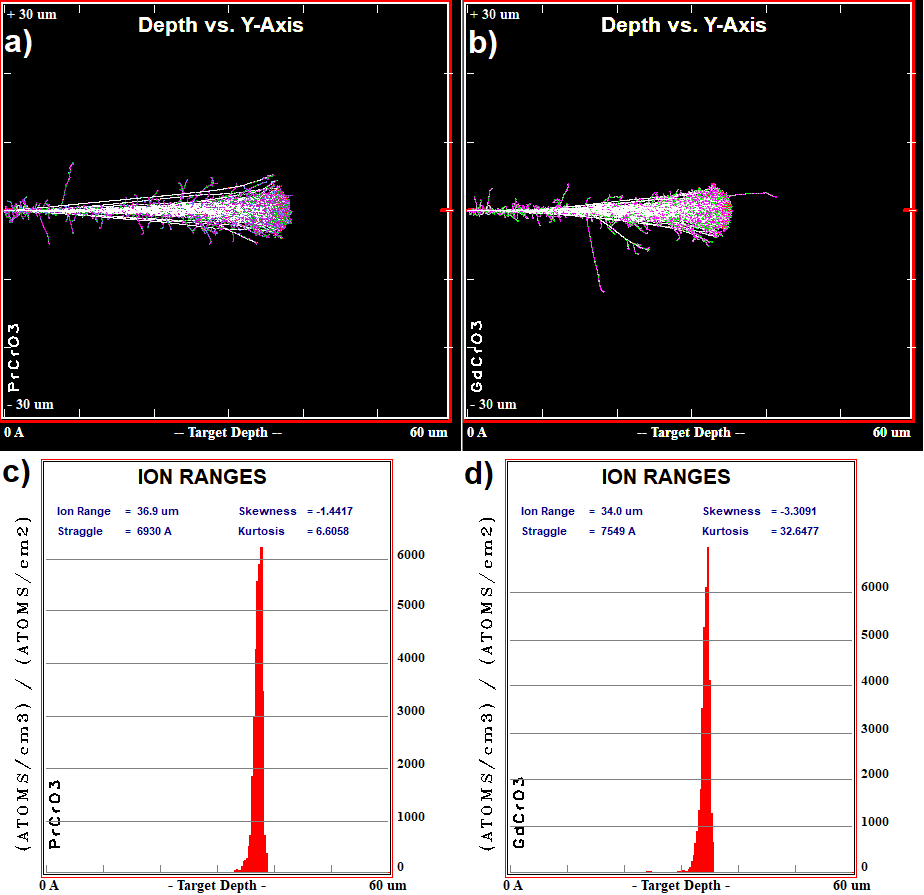


Supplementary Figure – SRIM calculation results of the 197Au+ ions stopping ranges in PrCrO3 and GdCrO3 materials: full damage cascades in a) PrCrO3, b) GdCrO3 and ion stopping ranges in c) PrCrO3, d) GdCrO3

# Supplementary Information Note 3. X-ray Penetration Depth Calculations

Supplementary Figure 4 shows the X-ray with a wavelength of 1.0785 Å penetration depth results for the perovskite PrCrO3 and GdCrO3 materials for the grazing angles range used in the experiment.


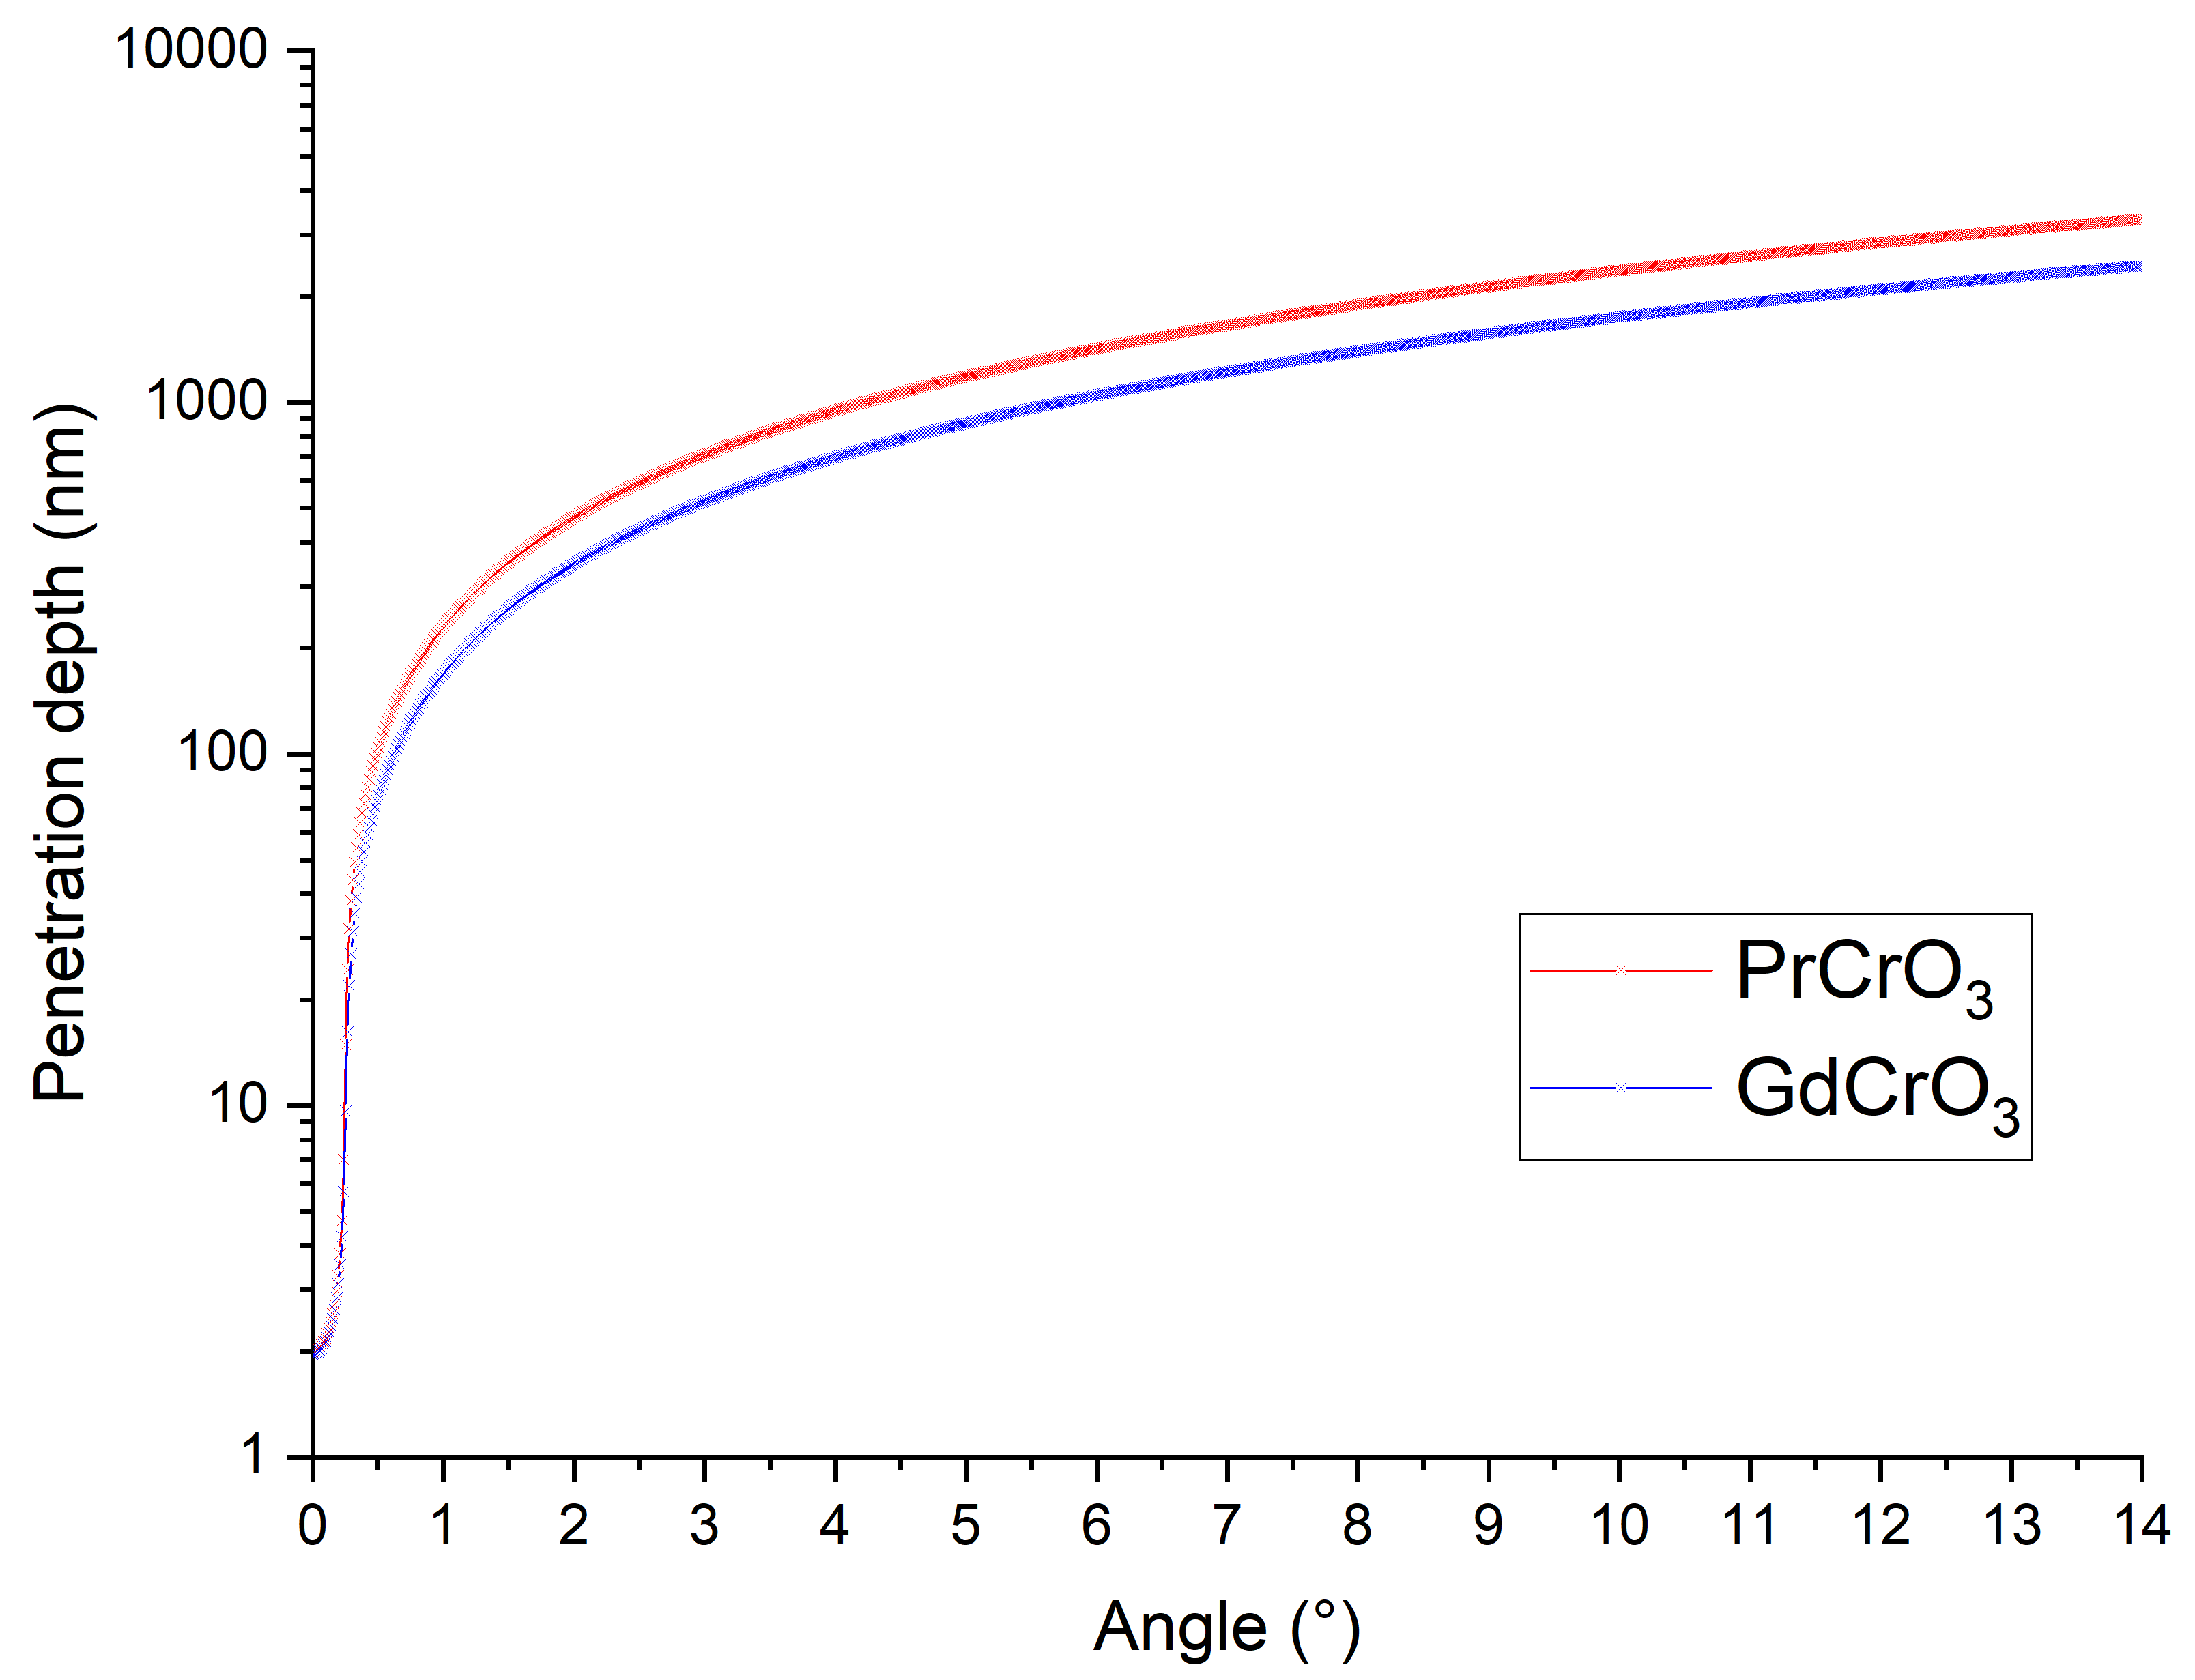


Supplementary Figure – Penetration depth of the X-rays with a wavelength of 1.0785 Å calculated for PrCrO3 (red) and GdCrO3 (blue) materials for the grazing angles range: 0-15°.

# Supplementary Information Note 4. Combined XANES Spectra

Supplementary Figure 5 shows the combined HERFD-XANES spectra for 200 ppm Cr-doped (U0.7Pr0.3)O2±x sample together with all Cr standards as well as *Ln*-free Cr-doped UO2±x bulk sample and Cr-doped UO2±x single crystal sample.


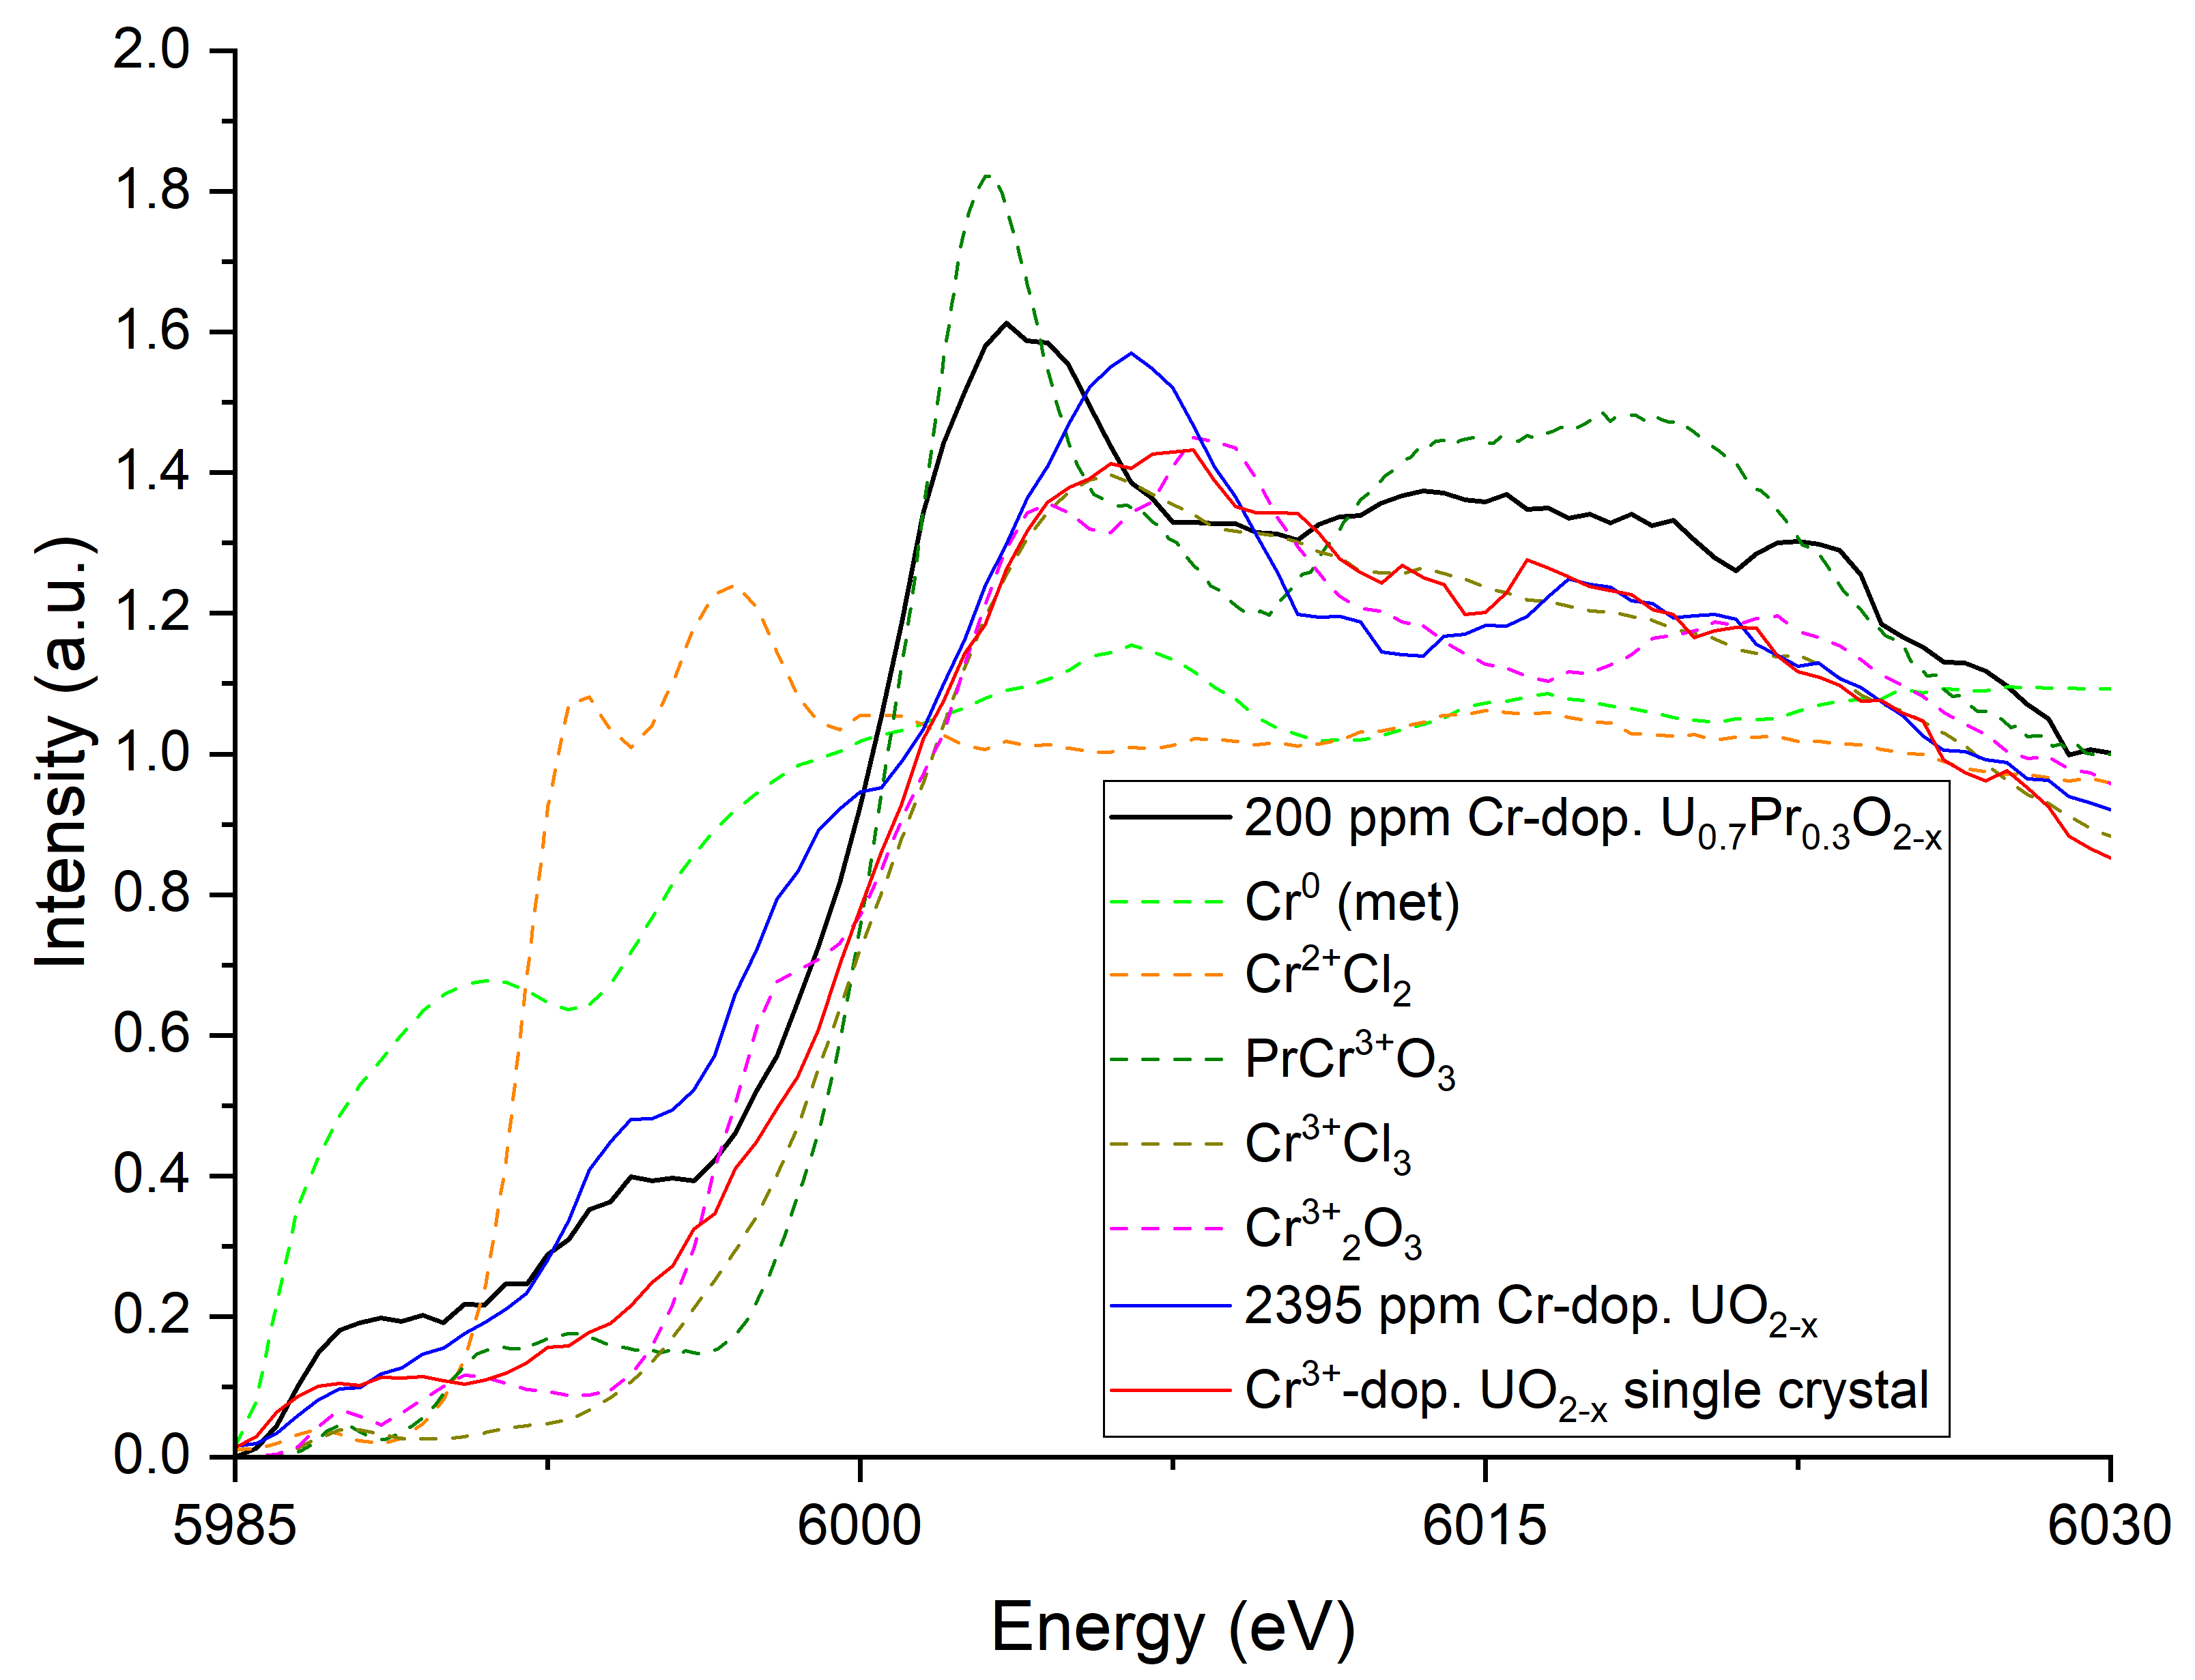


Supplementary Figure – Normalised combined HERFD-XANES Cr K-edge spectra for 200 ppm Cr-doped (U0.7Pr0.3)O2-x sample compared with the all standards (dashed lines), including Cr0 metallic, Cr2+Cl2 and Cr3+ standards as well as the Ln-free, Cr-doped UO2 bulk sample (blue solid line) and Cr-doped UO2 single crystal (red solid line)

Supplementary Figure 6 shows the combined HERFD-XANES spectra for 200 ppm Cr-doped (U0.7Gd0.3)O2-x sample together with all Cr standards as well as *Ln*-free Cr-doped UO2-x bulk sample and Cr-doped UO2-x single crystal sample.


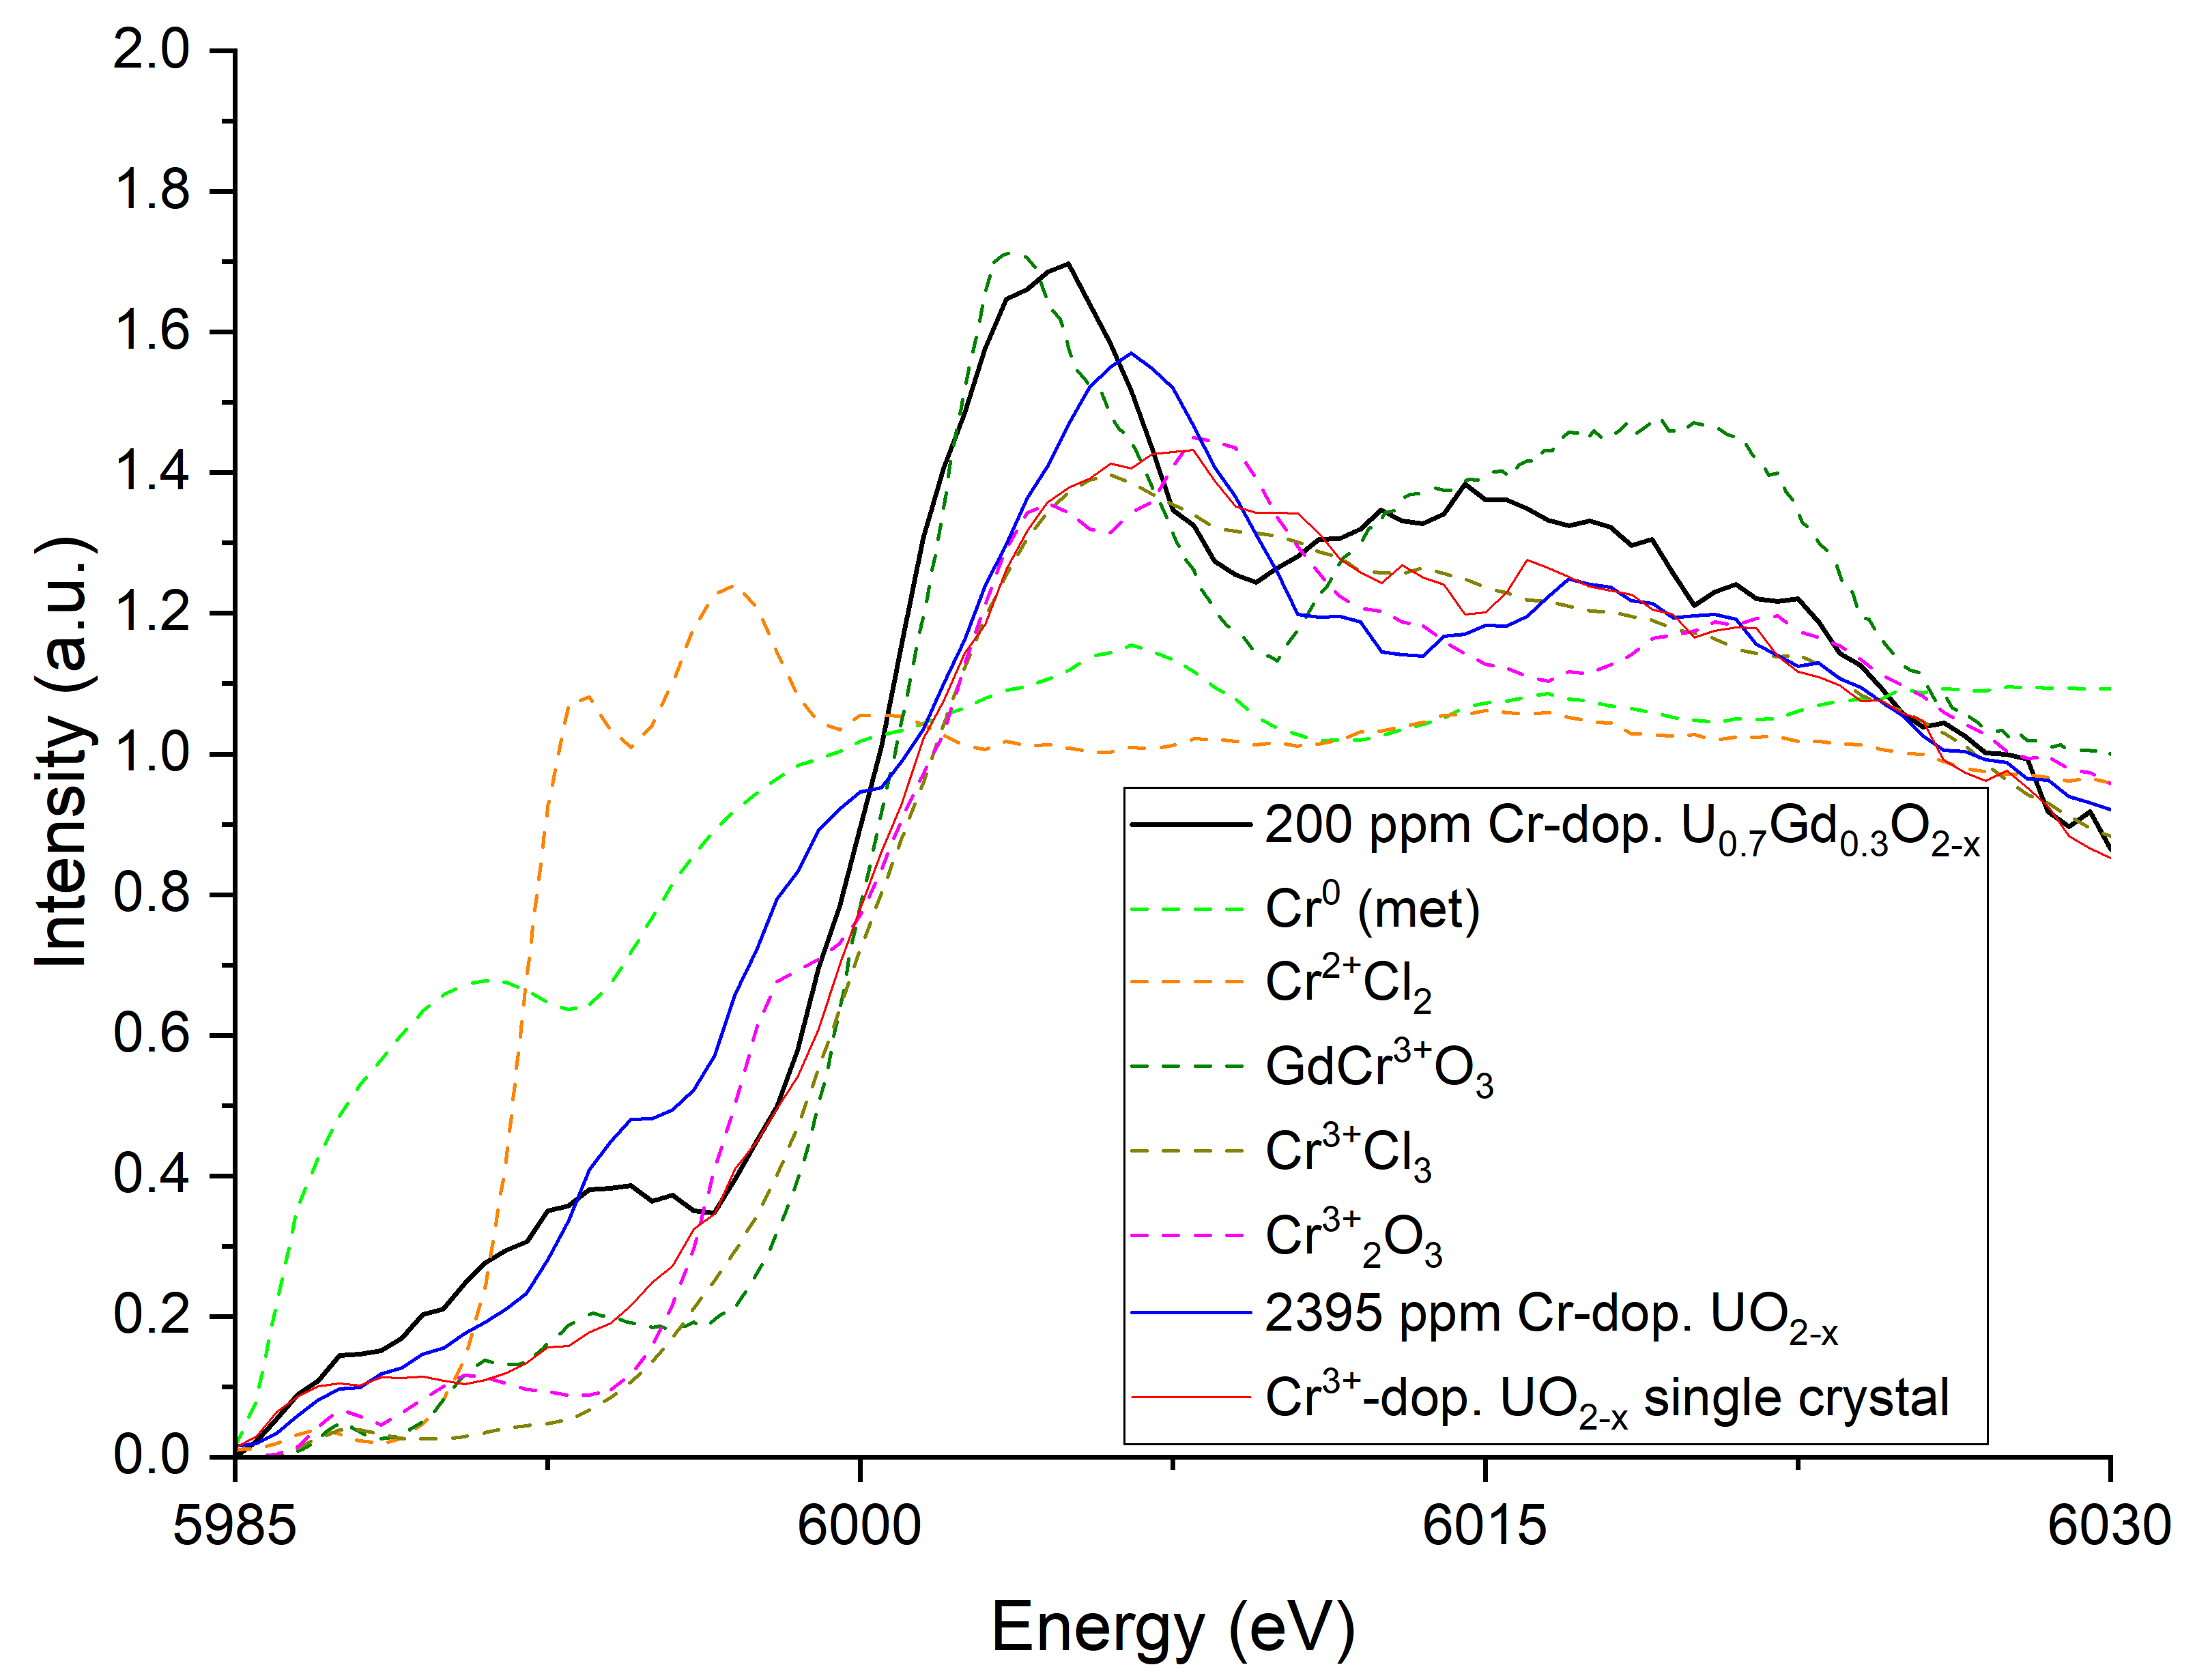


Supplementary Figure – Normalised combined HERFD-XANES Cr K-edge spectra for 200 ppm Cr-doped (U0.7Gd0.3)O2-x sample compared with the all standards (dashed lines), including Cr0 metallic, Cr2+Cl2 and Cr3+ standards as well as the *Ln*-free, Cr-doped UO2-x bulk sample (blue solid line) and Cr-doped UO2-x single crystal (red solid line)

# Supplementary Information Note 5. Images of Irradiated Perovskite Pellets

Supplementary Figure 7 shows the photo of the perovskite PrCrO3 and GdCrO3 samples taken after exposure to the ion irradiation.


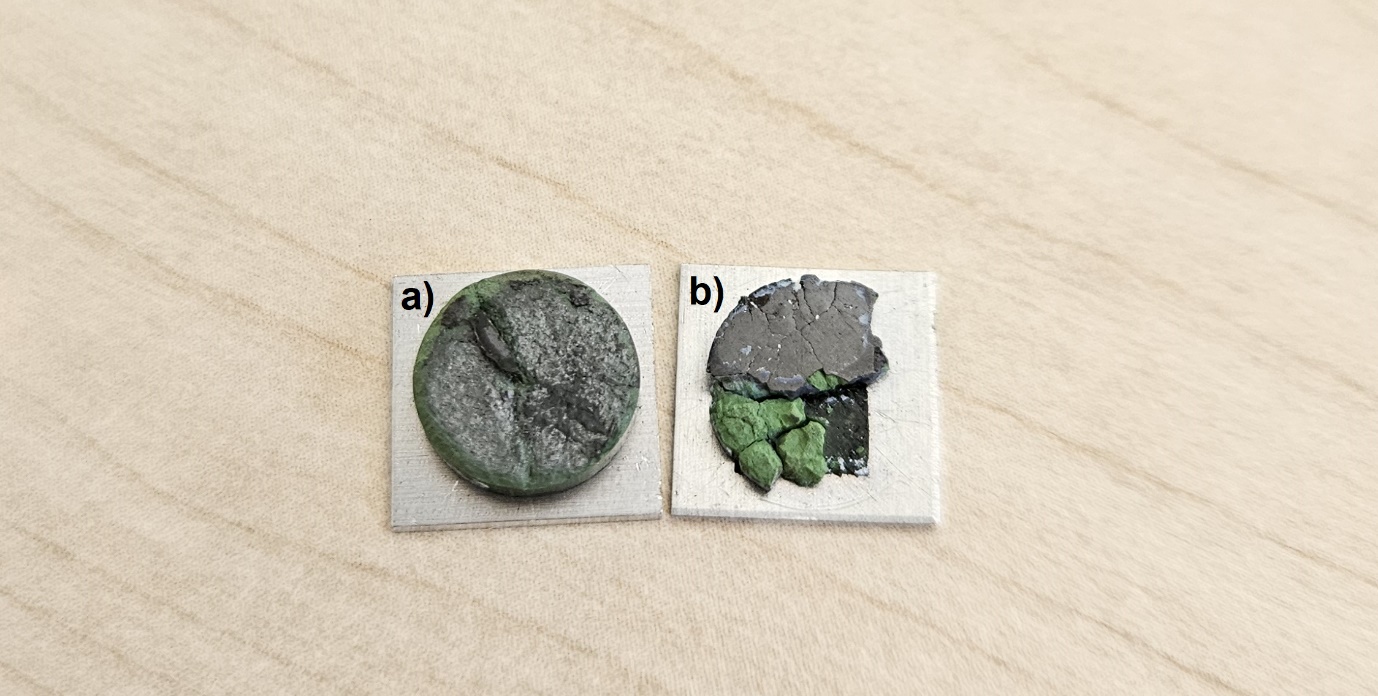


Supplementary Figure – Photo of the samples: a) PrCrO3 and b) GdCrO3 taken after they were irradiated and then cooled. The shiny areas are the irradiated zone, while the chipped pieces expose the interior of the pellet that was not irradiated. In the case of PrCrO3, only a narrow strip of the irradiated surface remained attached

# Supplementary Information Note 6. Grazing Incidence X-ray Diffraction

The GIXRD data collected for the irradiated PrCrO3 sample in the 2θ range of 10-70° is shown in Supplementary Figure 8.


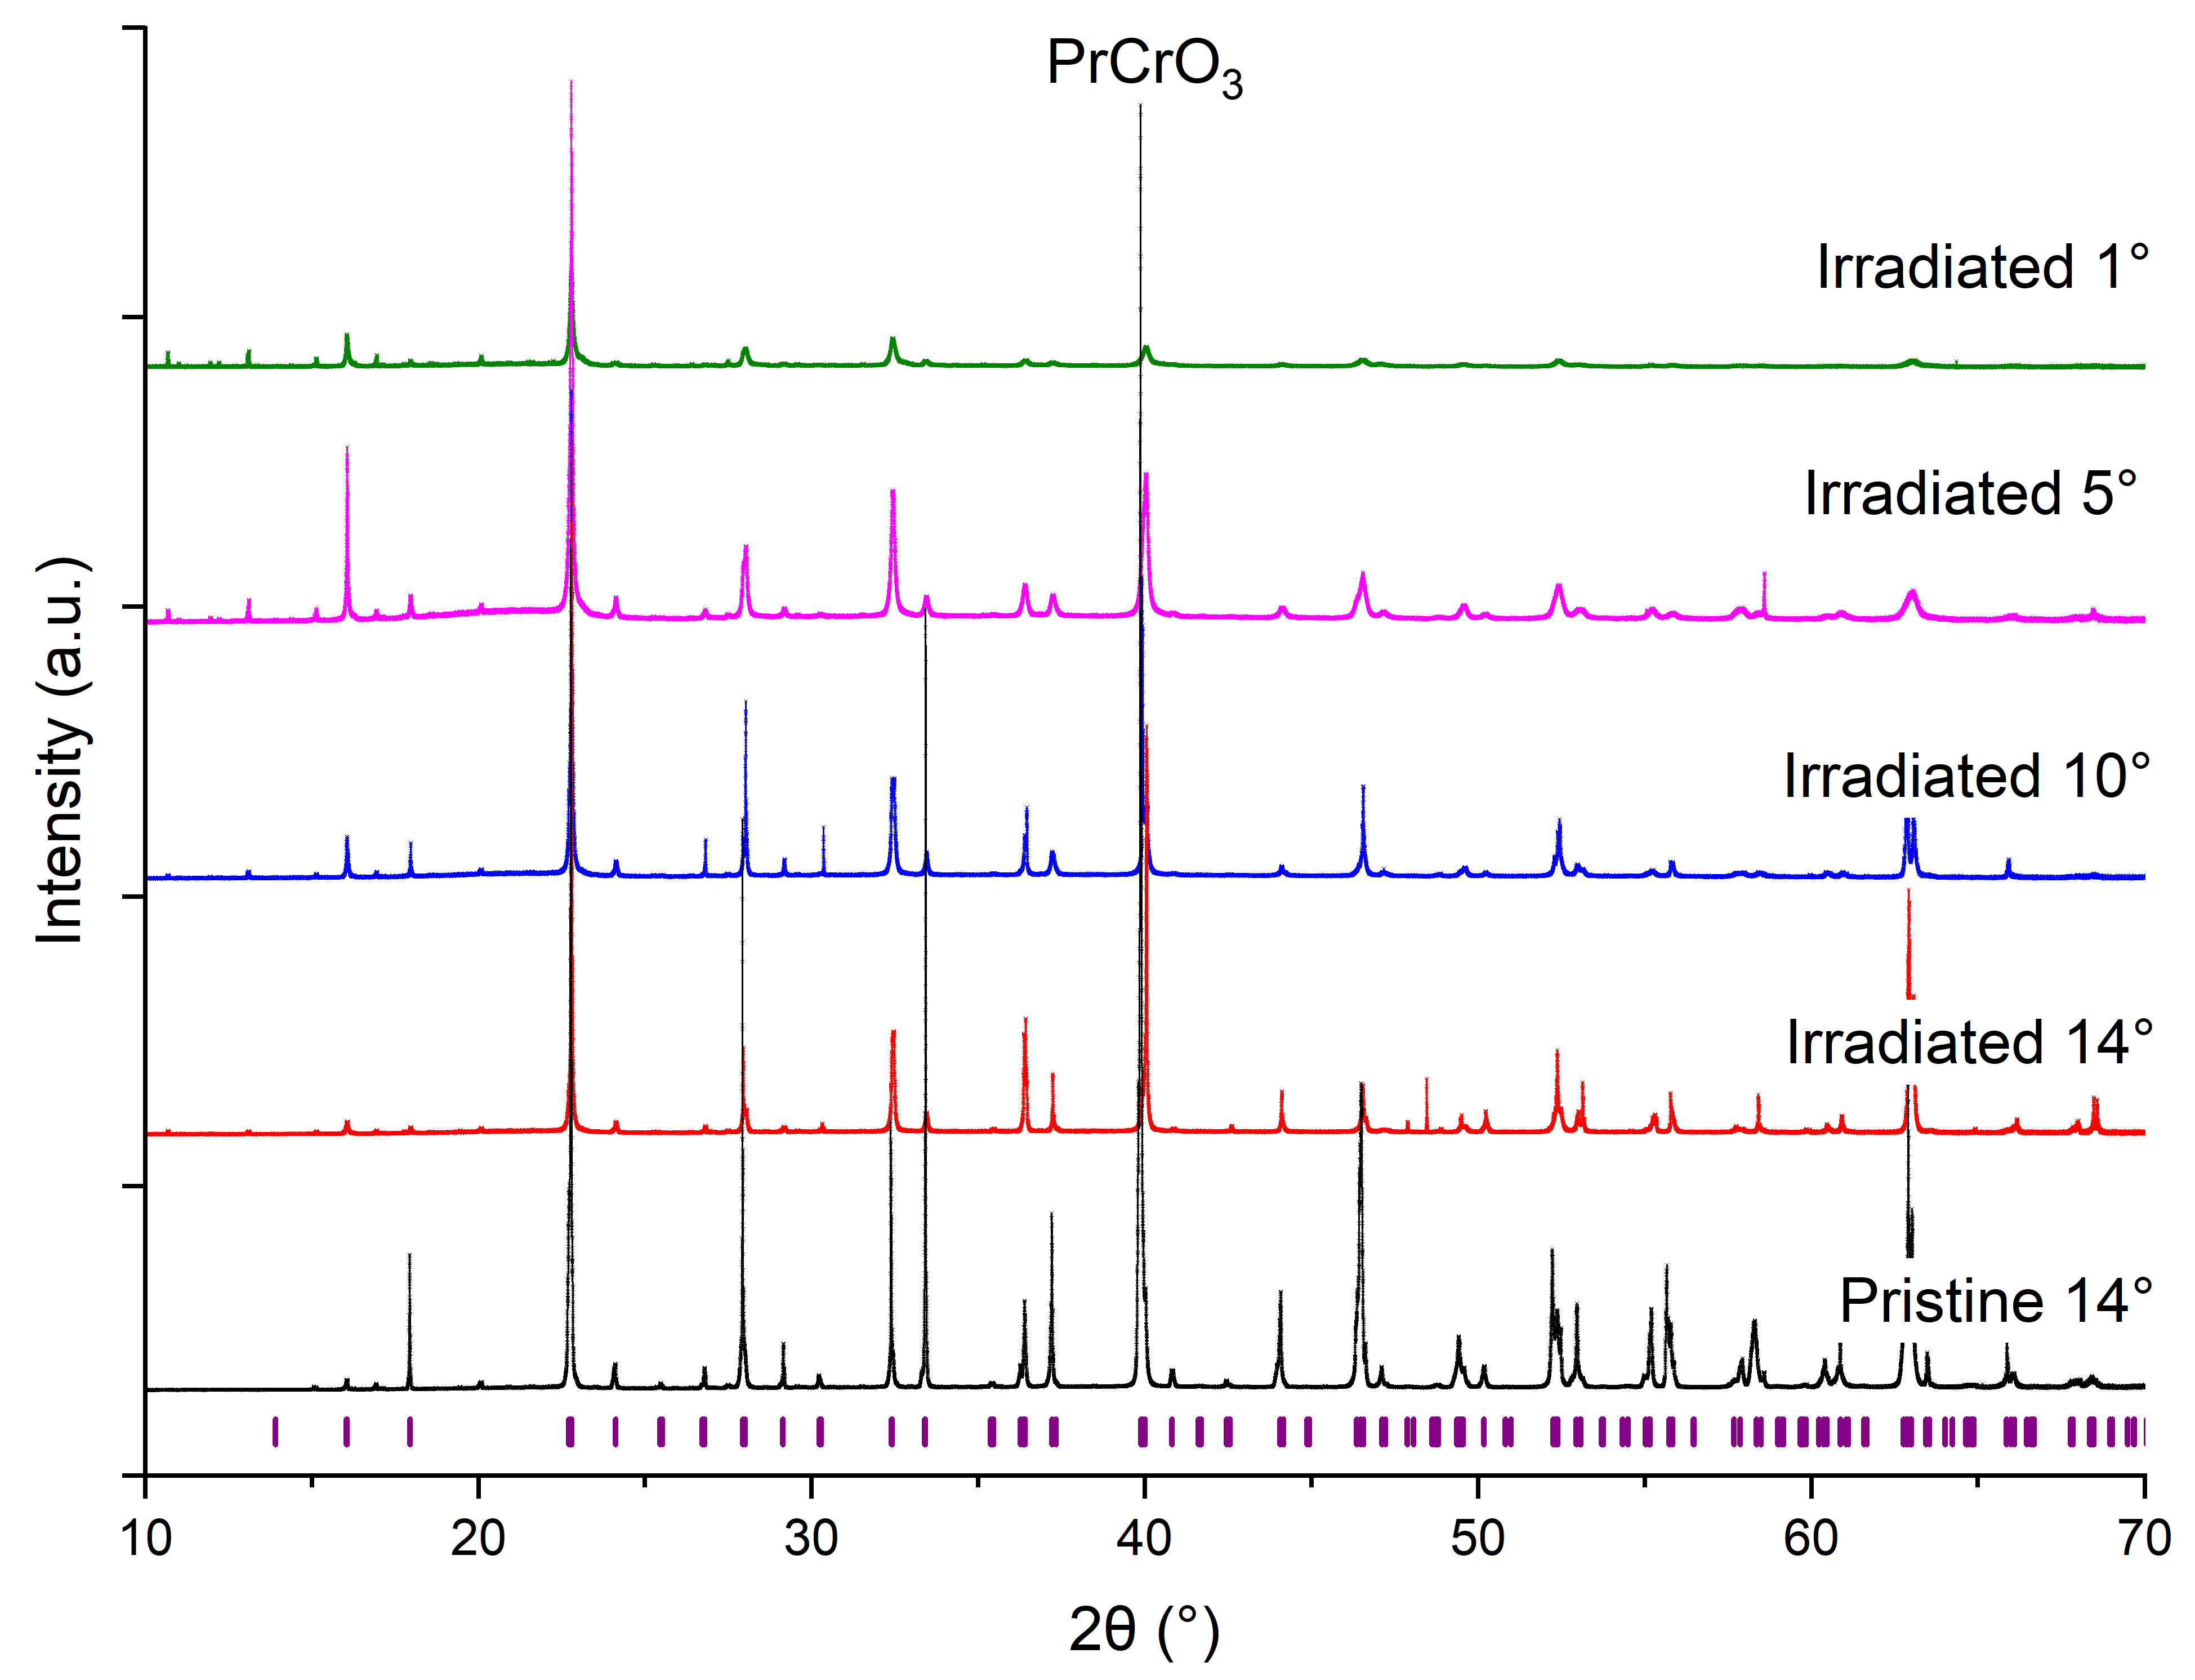


Supplementary Figure – The GIXRD diffractograms collected at X-ray wavelength of 1.0785 Å for PrCrO3 at different grazing angles are compared to those for the pristine surface. The purple marks represent the positions of the Bragg reflections.

The GIXRD data collected for the irradiated GdCrO3 sample in the 2θ range of 10-70° is shown in Supplementary Figure 9.


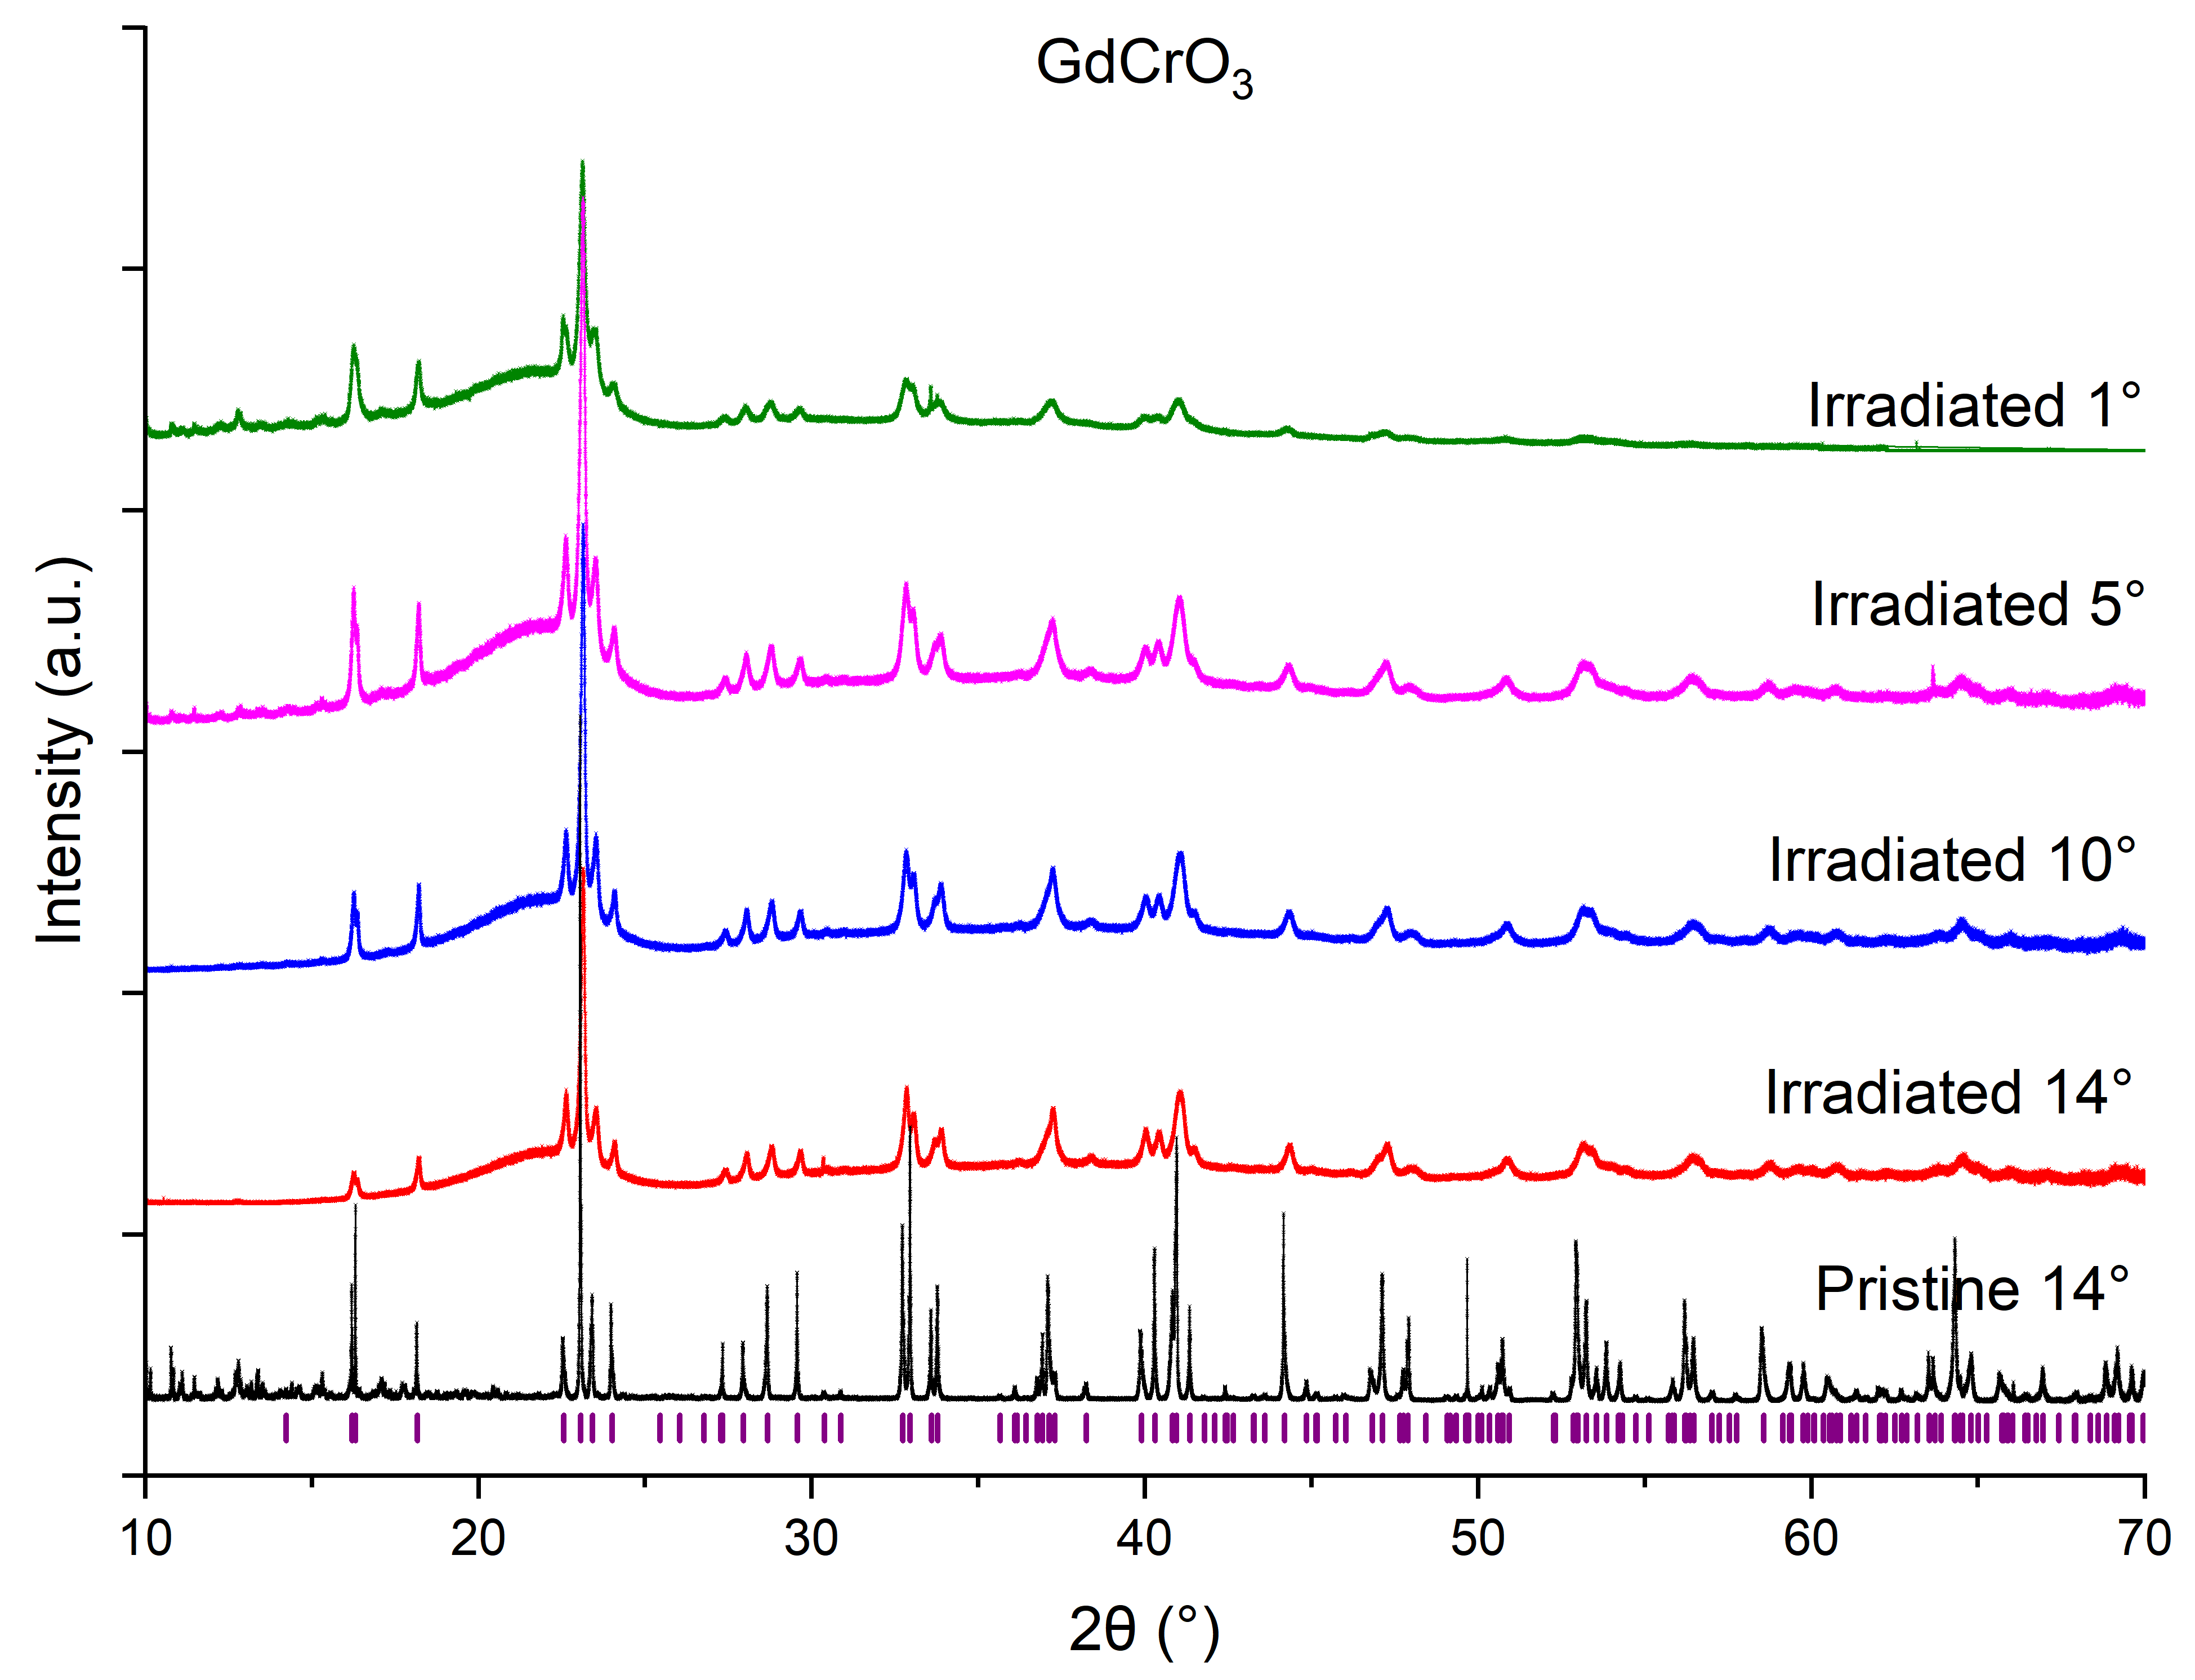


Supplementary Figure – The GIXRD diffractograms collected at X-ray wavelength of 1.0785 Å for GdCrO3 at different grazing angles are compared to those for the pristine surface. The purple marks represent the positions of the Bragg reflections.
